# Supplementary material for: Quantifying pollution transport from the Asian monsoon anticyclone into the lower stratosphere
Source: Copernicus journal article supplement (doi:10.5194/acp-17-7055-2017), 2017-06-14
Supplement: Supplementary file [file acp-17-7055-2017-supplement-title-page.pdf › acp-17-7055-2017-supplement-title-page.pdf]

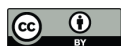

## *Supplement of*

# **Quantifying pollution transport from the Asian monsoon anticyclone into the lower stratosphere**

**Felix Ploeger et al.**

*Correspondence to:* Felix Ploeger (f.ploeger@fz-juelich.de)

- acp-17-7055-2017-supplement-title-page.pdf
- monsoon\_barrier\_PV\_0370\_10070112\_10090112.nc
- monsoon\_barrier\_PV\_0370\_11070112\_11090112.nc
- monsoon\_barrier\_PV\_0370\_12070112\_12090112.nc
- monsoon\_barrier\_PV\_0370\_13070112\_13090112.nc
- monsoon\_barrier\_PV\_0380\_10070112\_10090112.nc
- monsoon\_barrier\_PV\_0380\_11070112\_11090112.nc
- monsoon\_barrier\_PV\_0380\_12070112\_12090112.nc
- monsoon\_barrier\_PV\_0380\_13070112\_13090112.nc
- online\_suppl\_description.pdf

The copyright of individual parts of the supplement might differ from the CC BY 3.0 License.
